# Supplementary material for: Transcriptome alterations are enriched for synapse-associated genes in the striatum of subjects with obsessive-compulsive disorder
Source: PubMed Central journal article supplement (PMC7961029; doi:10.1038/s41398-021-01290-1), 2021-03-15
Supplement: 41398_2021_1290_MOESM3_ESM.pdf [file 41398_2021_1290_MOESM3_ESM.pdf]

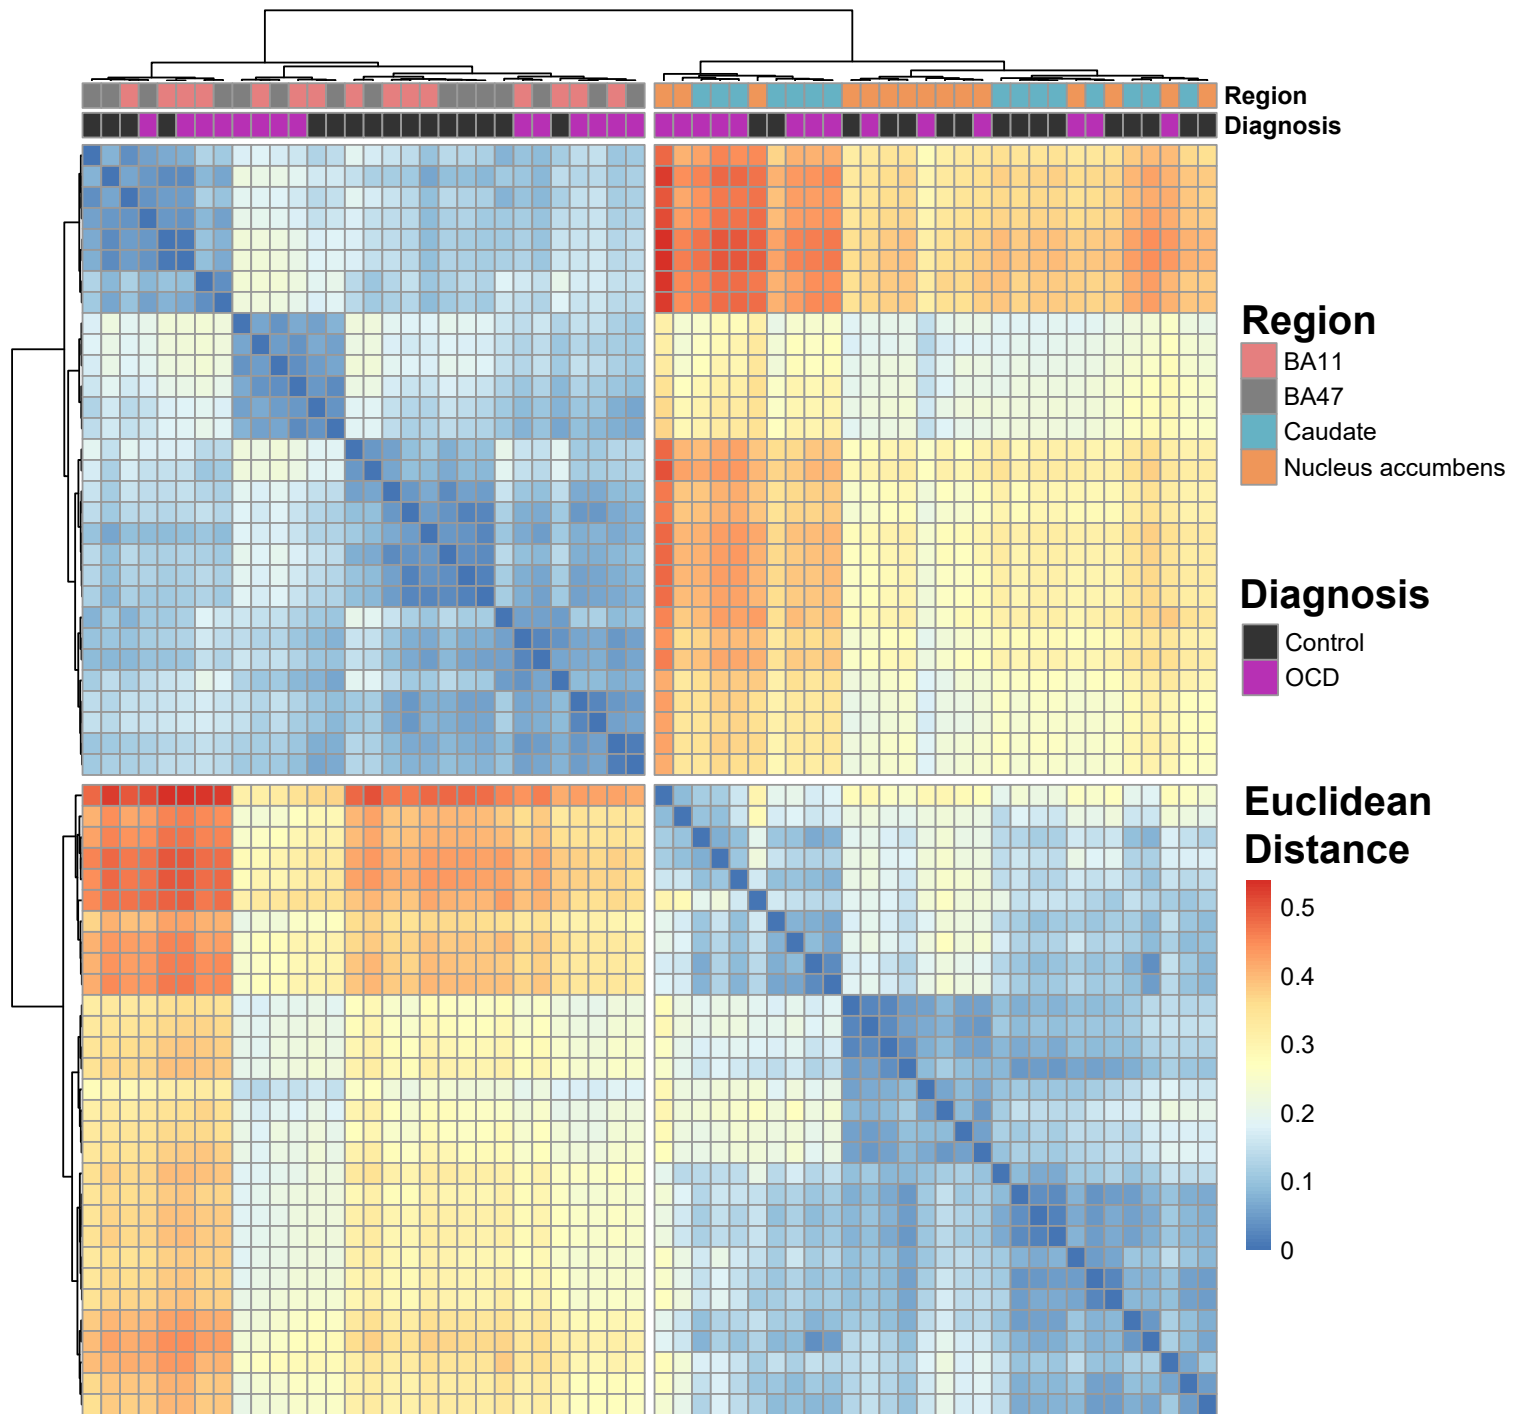

Supplemental Figure 2
